1

## 2 Spaced training enhances memory and prefrontal ensemble stability in mice

3 Annet Glas<sup>1,2</sup>, Mark Hübener<sup>1</sup>, Tobias Bonhoeffer<sup>1</sup>, Pieter M. Goltstein<sup>1</sup>

### 4 **Author Affiliations**

5 <sup>1</sup> Max Planck Institute of Neurobiology, Martinsried, Germany

6 <sup>2</sup> Graduate School of Systemic Neurosciences, Martinsried, Germany

### 7 **Lead Contacts**

8 Tobias Bonhoeffer, [tobias.bonhoeffer@neuro.mpg.de](mailto:tobias.bonhoeffer@neuro.mpg.de)

9 Pieter Goltstein, [goltstein@neuro.mpg.de](mailto:goltstein@neuro.mpg.de)

## 10 **Summary**

11 Memory is substantially improved when learning is distributed over time, an effect called “spacing effect”. So  
12 far it has not been studied how spaced learning affects neuronal ensembles presumably underlying memory.  
13 In the present study, we investigate whether trial spacing increases the stability or size of neuronal ensembles.  
14 Mice were trained in the “everyday memory” task, an appetitive, naturalistic, delayed matching-to-place task.  
15 Spacing trials by 60 minutes produced more robust memories than training with shorter or longer intervals.  
16 *c-Fos* labeling and chemogenetic inactivation established the necessity of the dorsomedial prefrontal cortex  
17 (dmPFC) for successful memory storage. *In vivo* calcium imaging of excitatory dmPFC neurons revealed that  
18 longer trial spacing increased the similarity of the population activity pattern on subsequent encoding trials  
19 and upon retrieval. Conversely, trial spacing did not affect the size of the total neuronal ensemble or the size  
20 of subpopulations dedicated to specific task-related behaviors and events. Thus, spaced learning promotes  
21 reactivation of prefrontal neuronal ensembles processing episodic-like memories.

## 22 Introduction

23 Extending the period between individual learning events can considerably strengthen a memory and increase  
24 its lifespan, a phenomenon called the “spacing effect”<sup>1</sup>. This phenomenon has been described across a wide  
25 range of species, from mollusk to man<sup>2</sup>. In mice, spaced training can strengthen associative<sup>3</sup> episodic-like<sup>4</sup>,  
26 motor<sup>5</sup>, and spatial<sup>6</sup> memories. The effectiveness of spacing learning is thought to be mediated by molecular  
27 and synaptic processes<sup>2</sup>, which involve activation and expression of key signaling proteins and transcription  
28 factors<sup>2; 6; 7</sup>, leading to increased synaptic plasticity<sup>5; 8</sup>. It has not yet been studied, whether and how  
29 increasing the spacing of learning events affects neuronal ensembles representing an individual memory.

30 During a learning experience, a subset of neurons is activated as a result of their intrinsic excitability and  
31 external sensory drive<sup>9; 10; 11; 12</sup>. The memory itself is thought to be encoded by synaptic connections that  
32 are newly formed or strengthened within this neuronal ensemble<sup>13; 14; 15</sup>. Subsequently, memories can be  
33 consolidated by further functional and structural synaptic remodeling, enabling long-term retention<sup>16; 17</sup>.  
34 For retrieval of a memory, neurons that are part of the ensemble need to be reactivated in a pattern similar  
35 to that during memory encoding<sup>11; 18; 19</sup>.

36 The working hypothesis for the present work is that the molecular and synaptic mechanisms underlying  
37 the spacing effect<sup>2</sup> can influence two characteristics of neuronal ensembles, i.e. the size or reactivation pattern  
38 of the ensemble, during memory encoding, storage, and retrieval. The reasoning is that when learning occurs  
39 over multiple optimally spaced trials, molecular signaling initiated in the first trial can extend the temporal  
40 window of enhanced neuronal excitability<sup>10; 20</sup> and thereby increase the likelihood of the same ensemble being  
41 reactivated in subsequent trials. As such, spaced training would more effectively strengthen the ensemble’s  
42 internal synaptic connectivity<sup>21; 22</sup> and by local competitive circuit interactions result in a sparser, but more  
43 reliably activated assembly<sup>23; 24; 25</sup>. Sparseness would safeguard the specificity of the represented memory<sup>26</sup>,  
44 while stronger connectivity would render the memory more resilient to homeostatic mechanisms that can  
45 result in forgetting<sup>27</sup> and thereby increase the probability of retrieval. Conversely, as the group of excitable  
46 neurons drifts over time<sup>10</sup>, consecutive learning experiences could activate different sets of neurons. Spacing  
47 learning experiences over extended periods could therefore allocate a memory to overlapping sets of neurons<sup>28</sup>.  
48 Within this framework, the memory enhancing effect of spaced training could be mediated by representing a  
49 learning experience with a larger neuronal ensemble<sup>4; 11</sup>.

50 To determine whether and how trial spacing changes the way neuronal ensembles represent learned  
51 experiences, we implemented the “everyday memory” task, a naturalistic delayed matching-to-place task <sup>7</sup>.  
52 The instilled episodic-like memories are typically forgotten within 24 hours, but spaced training reliably  
53 prolongs the period over which the memories can be retrieved <sup>7</sup>. Efficient execution of the everyday memory  
54 task relies on functions that have been attributed to the dorsal medial prefrontal cortex (dmPFC), including  
55 behavioral flexibility <sup>29</sup> and learning against a background of relevant prior knowledge <sup>30</sup>. Moreover, rodent  
56 prefrontal cortex is, in concert with hippocampus, involved in the encoding and retrieval of episodic-like  
57 memories <sup>31; 32</sup>, providing an attractive system for examining the relation between neuronal ensemble activity  
58 and memory strength.

59 Here we report that trial spacing improves memory and is accompanied with enhanced reactivation of  
60 the neuronal ensembles in dmPFC. Increasing trial spacing in the everyday memory task enhanced memory  
61 retrieval, yet impaired memory encoding. *In vivo* calcium imaging with a miniaturized microscope revealed  
62 that trial spacing results in more similar reactivation of the ensemble between encoding trials and upon  
63 memory retrieval. Conversely, trial spacing did not affect the size of the ensemble, suggesting that trial  
64 spacing primarily affects the synaptic strength within the neuronal ensemble but not its size.

## 65 Results

66 **Studying episodic-like memory in an “everyday memory” task.** We trained female mice ( $n = 20$ ) in  
67 repeated sessions of an “everyday memory” task (see Method Summary, **Figure 1A, B, Video 1**; <sup>7</sup>). Each  
68 training session consisted of three encoding trials (ETs; separated by an “encoding intertrial interval”) and  
69 three retrieval trials (RTs). During each encoding trial, mice entered the radial arm maze from a start box,  
70 explored the maze and retrieved a buried chocolate reward by digging in one of two available, odor-masked  
71 sandwells (i.e. the “rewarded” sandwell; **Figure S1A–C**). Upon completion of the final encoding trial, mice  
72 were kept in their home cage for an extended delay period (“retrieval delay”), after which the three retrieval  
73 trials (RTs) were conducted. During retrieval trials, mice had to revisit the previously rewarded sandwell.  
74 Simultaneously, mice had to refrain from digging at the previously non-rewarded sandwell, as well as four  
75 new non-rewarded sandwells (“non-cued” sandwells).

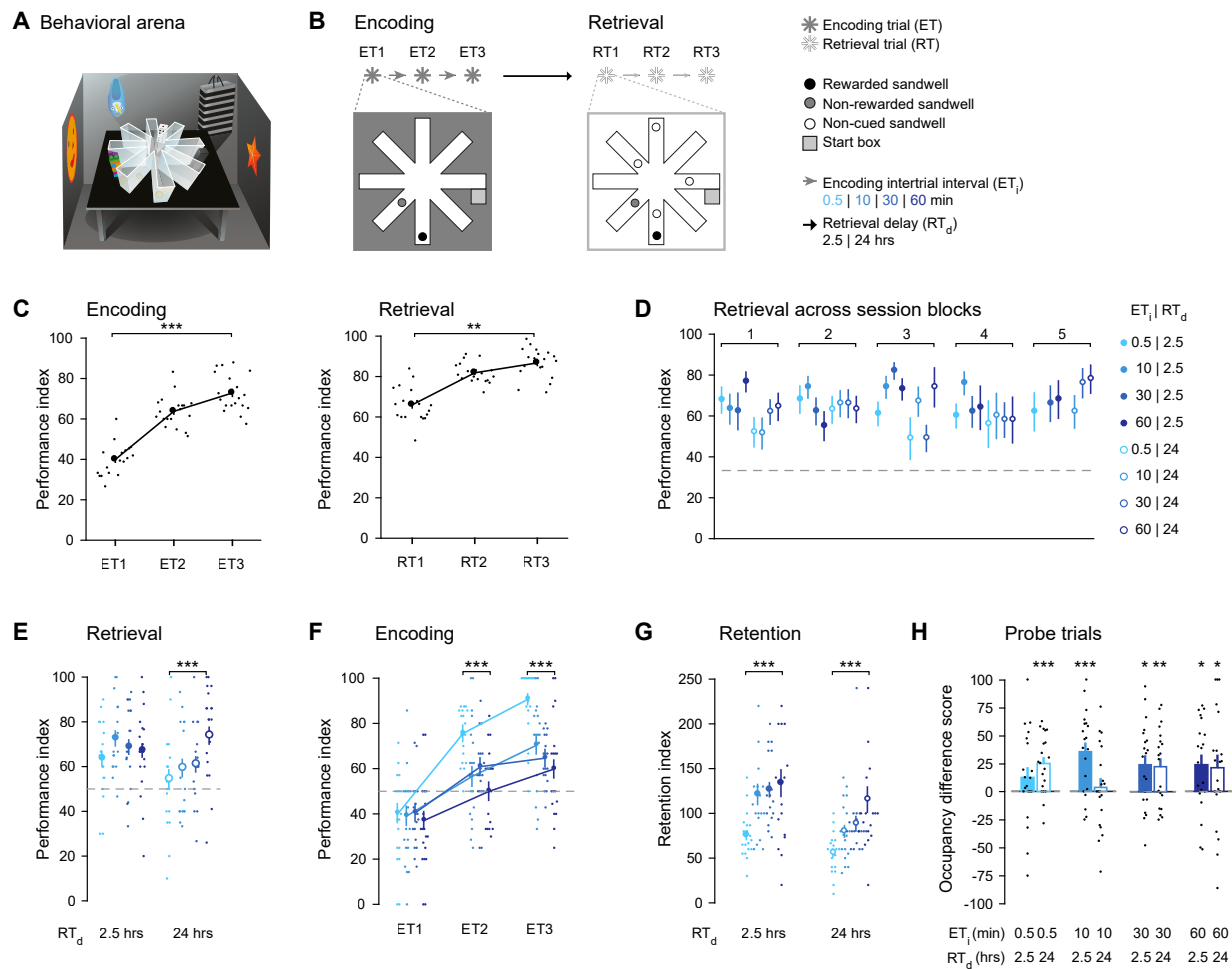

**Figure 1. Trial spacing enhances memory retrieval, yet impairs memory encoding on the everyday memory task.** **A** Schematic of behavioral training setup. **B** Schematic of session structure. Sandwell locations were altered on each session. **C** Performance improved across encoding (left) and retrieval trials (right; ET1 vs. RT3:  $X^2_5 = 75.6$ ,  $p = 7.03 \cdot 10^{-15}$ ,  $n = 19$  mice; ET1 vs. ET3:  $T = -0.88$ ,  $p = 2.38 \cdot 10^{-4}$ ; RT1 vs. RT3:  $T = -0.62$ ,  $p = 1.50 \cdot 10^{-3}$ ,  $n = 19$  mice). **D** Performance on RT1 remained stable over two months of behavioral training (first vs. last block of 8 sessions:  $U = 2.50 \cdot 10^4$ ,  $p = 0.089$ ). **E** Increasing the ET<sub>i</sub> did not alter memory retrieval performance on RT1 after a 2.5-hrs RT<sub>d</sub> ( $r_s = 0.06$ ,  $p = 0.608$ ), yet did after 24 hrs ( $r_s = 0.32$ ,  $p = 5.67 \cdot 10^{-3}$ ). **F** Increasing the ET<sub>i</sub> impaired performance at ET2 ( $r_s = -0.44$ ,  $p = 9.34 \cdot 10^{-5}$ ,  $n = 19$  mice) and ET3 ( $r_s = -0.53$ ,  $p = 8.69 \cdot 10^{-7}$ ,  $n = 19$  mice). **G** Increasing the ET<sub>i</sub> enhanced memory retention after a 2.5-hrs RT<sub>d</sub> ( $r_s = 0.42$ ,  $p = 2.70 \cdot 10^{-4}$ ,  $n = 19$  mice) and after a 24-hrs RT<sub>d</sub> ( $r_s = 0.50$ ,  $p = 7.63 \cdot 10^{-6}$ ,  $n = 19$  mice). **H** Memory was not observed after 2.5 hrs if training was conducted with an ET<sub>i</sub> of 0.5 min, but was after 24 hrs (ET<sub>i</sub> 0.5 min, RT<sub>d</sub> 2.5 hrs vs. chance:  $t_{19} = 1.35$ ,  $p = 0.194$ ; ET<sub>i</sub> 0.5 min, RT<sub>d</sub> 24 hrs vs. chance:  $t_{19} = 4.27$ ,  $p = 4.12 \cdot 10^{-4}$ ). Conversely, training with an ET<sub>i</sub> of 10 min resulted in memory after 2.5 hrs, but not after 24 hrs (ET<sub>i</sub> 10 min, RT<sub>d</sub> 2.5 hrs vs. chance:  $t_{19} = 4.30$ ,  $p = 3.89 \cdot 10^{-4}$ ; ET<sub>i</sub> 10 min, RT<sub>d</sub> 24 hrs vs. chance:  $t_{19} = 0.43$ ,  $p = 0.675$ ). Memory was present and stable on probe trials conducted after training using a 30-min or 60-min ET<sub>i</sub> (ET<sub>i</sub> 30 min, RT<sub>d</sub> 2.5 hrs vs. chance:  $t_{19} = 2.83$ ,  $p = 0.011$ ; ET<sub>i</sub> 30 min, RT<sub>d</sub> 24 hrs vs. chance:  $t_{19} = 2.94$ ,  $p = 0.008$ ; ET<sub>i</sub> 60 min, RT<sub>d</sub> 2.5 hrs vs. chance:  $t_{19} = 2.63$ ,  $p = 0.017$ ; ET<sub>i</sub> 60 min, RT<sub>d</sub> 2.5 hrs vs. chance:  $t_{19} = 2.48$ ,  $p = 0.023$ ). Filled dots indicate data from one mouse, circles and bars indicate mean ( $\pm$  SEM) across mice, and gray dashed lines indicates chance level. \*  $p < 0.05$ , \*\*  $p < 0.01$ , \*\*\*  $p < 0.001$ .

76 After each session, we changed the spatial configuration of the sandwells and the position of the start box.  
77 Consequently, mice had to relearn and remember a different rewarded location in each subsequent session  
78 (**Figure S1D**). Performance in each trial was quantified as the number of incorrect sandwells the mouse dug  
79 in, relative to the total number of available sandwells (see Supplemental Information).

80 We first characterized the conditions under which mice were able to successfully complete the task. Memory  
81 was only reliably retrieved after training with multiple encoding trials in which the rewarded location was  
82 kept constant (**Figure S2**). In sessions, performance increased across subsequent encoding trials, as well as  
83 subsequent retrieval trials, verifying that mice can encode and retrieve memories in this task (**Figure 1C**).  
84 In addition, we studied the within- and between-session strategies that mice employ in this task. Altering  
85 the start box location between and after encoding trials confirmed that mice primarily used an allocentric  
86 (world-centered) rather than egocentric (body-centered) reference frame (**Figure S3A–D**; <sup>33</sup>). Within a  
87 session, mice focused their search progressively closer to the rewarded arm (**Figure S3E**) and revisited  
88 non-rewarded arms less than expected from chance (**Figure S3F**). Between sessions, the previous session's  
89 retrieval performance did not affect the next session's retrieval performance (**Figure S3G**), suggesting that a  
90 successfully stored memory did not interfere with learning of a new memory. From these analyses, we conclude  
91 that mice employ both a “within-session win-stay” and “between-session switch” strategy to optimize their  
92 task performance.

93 **Increasing trial spacing enhances memory retrieval but impairs memory encoding.** To examine  
94 the influence of trial spacing on encoding and retrieval of episodic-like memory, we tested the effect of four  
95 encoding intertrial intervals: 30 s (i.e. “massed” training, 119 sessions), 10 min (115 sessions), 30 min (133  
96 sessions), and 60 min (132 sessions; **Figure 1B, Video 1**). To probe the effect of trial spacing on same- and  
97 next-day memory retrieval separately, we conducted retrieval trials after a retrieval delay of either 2.5 or 24  
98 hrs. Performance was stable over months of training, allowing us to average a mouse's performance across  
99 sessions of the same encoding intertrial interval and retrieval delay (**Figure 1D**).

100 Memory retrieval after 24 hrs was improved when encoding intertrial intervals were longer, yet no effect  
101 was observed after 2.5 hrs (**Figure 1E**). This difference was not unexpected as trial spacing primarily affects  
102 less recent memories <sup>2</sup>. In addition, we observed that performance in the second and third encoding trial was

103 reduced when encoding intertrial intervals were extended (**Figure 1F**). As a control, we compensated for  
104 impaired encoding by normalizing the performance in the first retrieval trial to the encoding performance  
105 in the final, third encoding trial (“retention”). Retention thereby addressed how much of the successfully  
106 encoded information persisted and subsequently could be retrieved. Memory retention positively correlated  
107 with encoding intertrial interval after both a 2.5 hrs and 24 hrs retrieval delay (**Figure 1G**).

108 In a subset of sessions, we quantified the absolute strength of the memory by conducting a probe trial,  
109 which replaced the first retrieval trial. In these probe trials, the previously rewarded sandwell did not contain  
110 reward for the first minute of exploration (**Video 2, 3**). Memory in probe trials was quantified as the relative  
111 dig time at the rewarded sandwell, normalized to the total dig time at the rewarded and non-rewarded  
112 sandwell (termed the “occupancy difference score”). In sessions conducted with spaced encoding intertrial  
113 intervals, we observed an inverted U-shaped effect of trial spacing on next-day memory. Specifically, mice  
114 that were trained using a 10 or 180 min encoding intertrial interval did not remember the rewarded location  
115 after 24 hrs (**Figure 1H, S4**), while memories persisted after training with encoding intertrial intervals of 30  
116 min or 60 min (**Figure 1H**). Unexpectedly, massed training did not result in same-day memory, but memory  
117 was observed after 24 hrs and was even still present after 48 hrs (see Discussion, **Figure 1H, S4**).

118 Differences in trial spacing could affect a number of memory-related behavioral variables besides error-  
119 based performance: the latency to find the rewarded sandwell, distance traveled, running speed, relative  
120 dig time, and number of arm visits (**Figure S5**). In consecutive encoding trials, we observed a quantitative  
121 reduction in the variables that are indicative of exploration, i.e. latency, distance traveled, running speed, and  
122 number of arms visited. Conversely, we observed an increase in the relative dig time, a measure of exploitation  
123 of memory of the rewarded location. These results suggest that mice explored less and increasingly used  
124 their recollection of the rewarded sandwell location in subsequent encoding trials. However, none of these  
125 behavioral variables were significantly influenced by trial spacing. We conclude that increased trial spacing  
126 enhances memory retrieval, independent of the impairing effect on memory encoding.

127 **The dmPFC is activated and necessary during the everyday memory task.** We investigated whether  
128 the effects of trial spacing on memory strength were mediated by the dmPFC. To validate that training in  
129 the everyday memory task activates the dmPFC, we quantified neuronal activation during encoding using  
130 expression of the immediate early gene c-Fos (**Figure 2A**). c-Fos expression in the dmPFC was increased  
131 after training as compared to handled or home cage controls (**Figure 2B, C**). However, the number of  
132 c-Fos-expressing neurons was similar after training spaced with any encoding intertrial interval. This suggests  
133 that trial spacing did not increase the number of activated neurons during memory encoding.

134 To establish a causal role of the dmPFC, we chemogenetically inhibited it. We bilaterally transduced  
135 excitatory dmPFC neurons with the inhibitory chemogenetic tool hM4D(Gi), which is activated by clozapine-  
136 *N*-oxide (CNO; **Figure 2D, E**; <sup>34</sup>). We first verified receptor function in dmPFC *ex vivo* electrophysiological  
137 recordings and established that CNO application to acute brain slices reduced the excitability of dmPFC  
138 neurons expressing hM4D(Gi) (**Figure S6**). Next, we addressed the role of dmPFC activity during the  
139 everyday memory task using a full factorial 2<sup>4</sup> design (see Method Summary; **Figure 2D**). In well-trained  
140 mice expressing either hM4D(Gi) (n = 7) or mCherry (n = 5), we injected either vehicle or CNO at either  
141 of two time points (i.e. before memory encoding or before retrieval) using either of two encoding intertrial  
142 intervals (i.e. 0.5 min and 60 min; **Figure 2D**). Pooling data across time points and intervals showed that  
143 CNO-mediated inhibition impaired memory retrieval in hM4D(Gi)-expressing mice (**Figure 2F**). CNO  
144 application similarly reduced memory retrieval between individual time points and interval durations (**Figure**  
145 **2G, H**). However, evaluating the individual time points and interval durations revealed that memory retrieval  
146 was only significantly influenced when the dmPFC was inhibited during spaced (i.e. 60 min) encoding. Overall,  
147 we conclude that memory storage requires dmPFC activation.

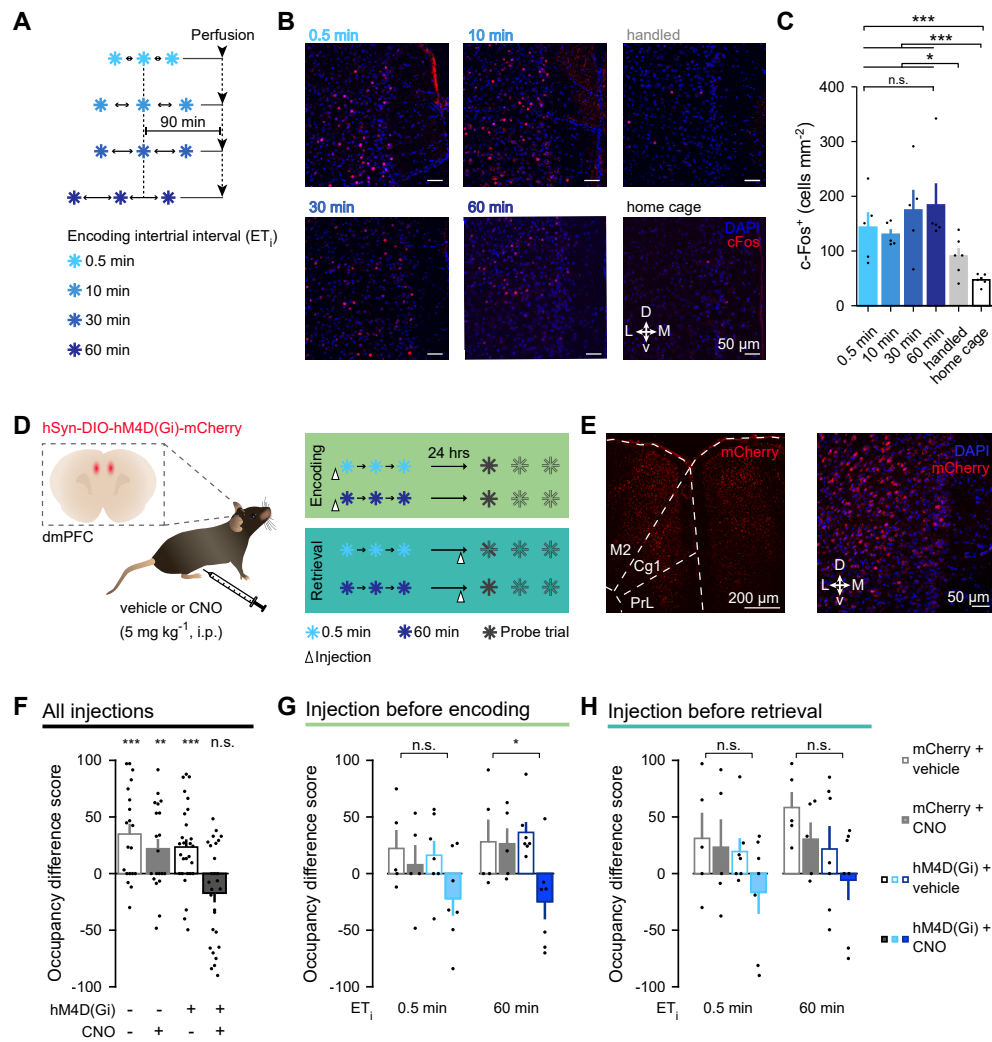

**Figure 2. dmPFC activity is increased and necessary during the everyday memory task.** **A** Timeline of behavioral procedures and tissue collection. **B** Representative images of c-Fos labeling in the dmPFC. **C** Training with any ET<sub>i</sub> increased the number of cells expressing c-Fos as compared to home cage or handled controls ( $H_3 = 15.8$ ,  $p = 3.65 \cdot 10^{-4}$ ; training vs. home cage:  $p = 7.71 \cdot 10^{-4}$ ; training vs. handled:  $p = 0.013$ ). Increasing the ET<sub>i</sub> did not alter the number of c-Fos-expressing cells ( $H_4 = 1.19$ ,  $p = 0.754$ ). **D** Chemogenetic silencing experiment. **E** Representative images of hM4D(Gi)-mCherry-expressing neurons in the dmPFC. **F** Memory on probe trials was impaired after silencing the dmPFC by injecting CNO into mice expressing hM4D(Gi)-mCherry (data pooled across injection time points and encoding intertrial intervals; mCherry + vehicle vs. chance:  $t_{19} = 3.87$ ,  $p = 5.13 \cdot 10^{-4}$ ; mCherry + CNO vs. chance:  $t_{19} = 2.56$ ,  $p = 9.51 \cdot 10^{-3}$ ; hM4D(Gi) + vehicle vs. chance:  $t_{19} = 3.45$ ,  $p = 9.61 \cdot 10^{-4}$ ; hM4D(Gi) + CNO vs. chance:  $t_{19} = -2.14$ ,  $p = 0.979$ ). **G** Memory was significantly reduced after silencing the dmPFC using CNO during spaced encoding (ET<sub>i</sub> 60 min [right];  $F_{4,20} = 4.16$ ,  $p = 0.019$ , group,  $t = 1.46$ ,  $p = 0.161$ ; drug,  $t = 1.18$ ,  $p = 0.251$ ; interaction,  $t = -2.51$ ,  $p = 0.021$ ) but not massed encoding (ET<sub>i</sub> 0.5 min [left];  $F_{4,20} = 1.08$ ,  $p = 0.179$ , group,  $t = 0.37$ ,  $p = 0.718$ ; drug,  $t = 0.19$ ,  $p = 0.855$ ; interaction,  $t = -0.77$ ,  $p = 0.448$ ). **H** Same as in (**G**), for retrieval (ET<sub>i</sub> 0.5 min [left];  $F_{4,20} = 1.31$ ,  $p = 0.298$ , group,  $t = 0.27$ ,  $p = 0.788$ ; drug,  $t = 0.32$ ,  $p = 0.753$ ; interaction,  $t = -0.73$ ,  $p = 0.473$ ; ET<sub>i</sub> 60 min [right];  $F_{4,20} = 3.21$ ,  $p = 0.062$ , group,  $t = -0.64$ ,  $p = 0.526$ ; drug,  $t = -0.47$ ,  $p = 0.642$ ; interaction,  $t = 0.01$ ,  $p = 0.990$ ). Cg1: cingulate cortex, area 1, M2: secondary motor cortex, PrL: prelimbic cortex. Scale bars 50 μm (B), 200 μm (E, left), 50 μm (E, right). Bars indicate mean ( $\pm$  SEM) across mice, black dots indicate data from a single mouse. \*  $p < 0.05$ , \*\*  $p < 0.01$ , \*\*\*  $p < 0.001$ , n.s. non-significant.



148 **Trial spacing increases the stability of the prefrontal cortex activation pattern.** The major aim  
149 of this study was to evaluate whether trial spacing stabilizes the activity patterns of the neuronal populations  
150 throughout a session, i.e. whether it facilitates reactivation of a similar neuronal ensemble in subsequent trials.  
151 To this end, we used *in vivo* calcium imaging to simultaneously measure the activity patterns of on average  
152  $210 \pm 99$  (SD) individual dmPFC neurons per session in freely-moving mice ( $n = 499$  sessions across 19 mice;  
153 **Figure 3A, B, S1E**; <sup>35</sup>). After gaining optical access to the dmPFC with an implanted microprism, we  
154 used a miniaturized microscope (Doric Lenses) to image neurons expressing the calcium indicator GCaMP6m  
155 (**Figure 3C, Figure S7A–E**; <sup>36</sup>). We ensured that carrying the miniaturized microscope did not hamper  
156 the mouse's motility in the radial arm maze (**Figure S7F, G**). Using the constrained nonnegative matrix  
157 factorization for microendoscopic data (CNMF-E) algorithm <sup>37</sup>, we extracted neuronal calcium activity and  
158 used the deconvolved inferred spike rate for further analysis (see Supplemental Methods). We computed the  
159 probability of a neuron being active by comparing the inferred spike rate in each trial to the pre-trial baseline  
160 period, using temporal subsampling to control for session duration ( $p_{\text{active}}$ ; see Supplemental Information;  
161 **Figure S8A–C**). We subsequently concatenated these values into an ensemble response vector and stacked  
162 the single-trial ensemble response vectors into an ensemble response matrix ( $n$  neurons  $\times$  6 trials; **Figure**  
163 **3D**). The Pearson correlation between the rows of this matrix was used as the sessions trial-to-trial ensemble  
164 stability measure (**Figure 3D**).

165 The ensemble correlation between the first and second encoding trial was enhanced when the intertrial  
166 interval was longer, establishing that the ensemble reactivated more precisely (**Figure 3E, F**). Furthermore,  
167 trial spacing increased the ensemble correlation between the third encoding trial and the first retrieval trial,  
168 suggesting that the population activity pattern present during learning was more likely to be reactivated  
169 during retrieval (**Figure 3E, F**). The effect of trial spacing on ensemble correlation was not dependent on  
170 behavioral performance. As an alternative measure for similarity, we calculated the Euclidian distance between  
171 ensemble response vectors, which yielded similar results (**Figure S8D**). Overall, we find that increased trial  
172 spacing enhanced reactivation of the ensemble activity pattern instilled during encoding, while simultaneously  
173 strengthening memory retention.

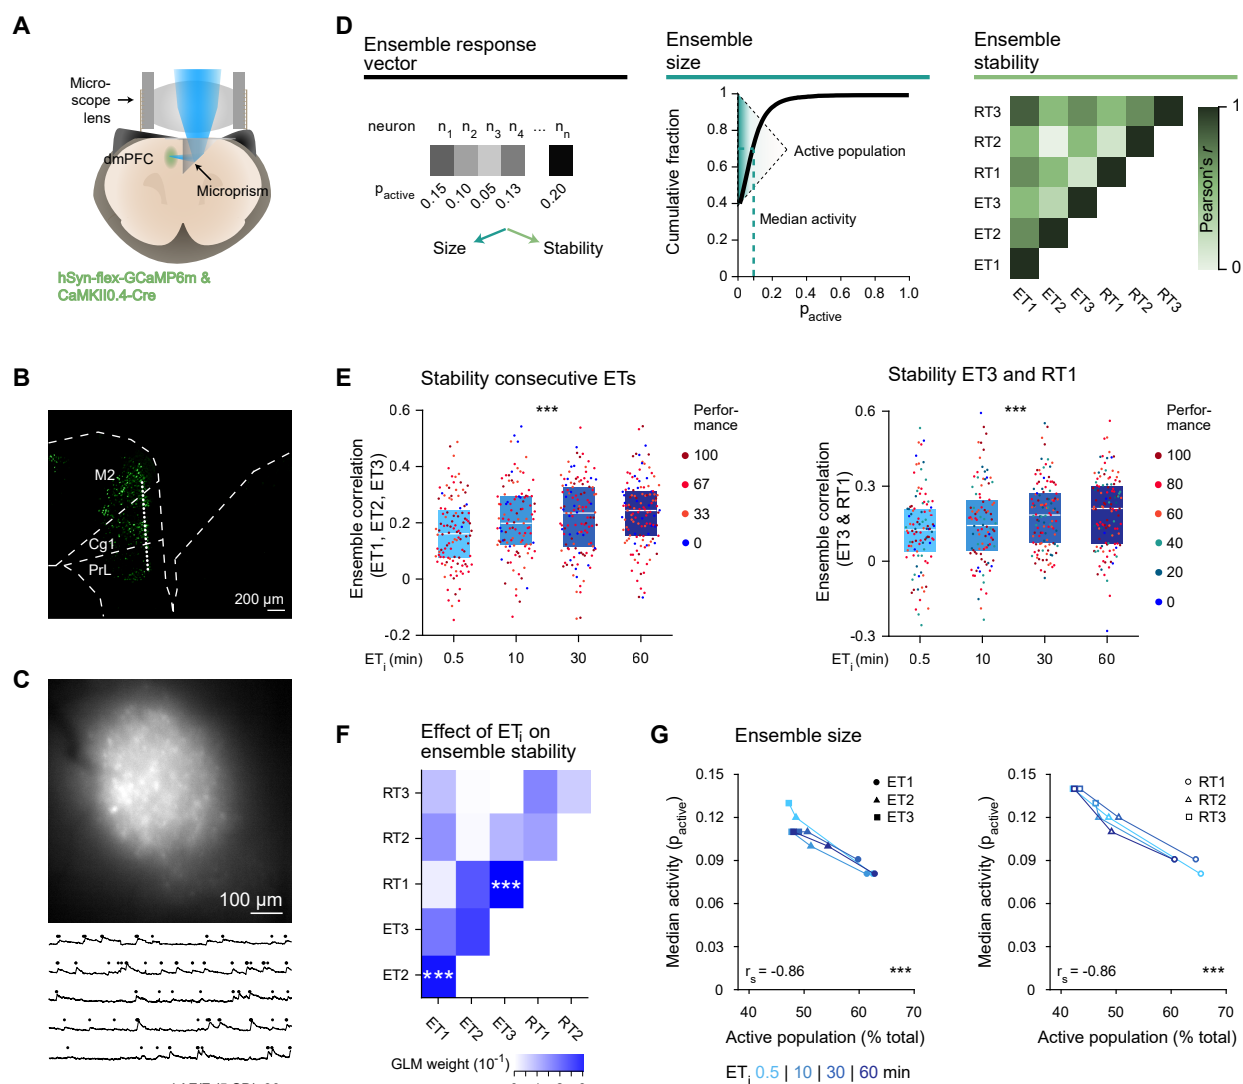

**Figure 3. Trial spacing enhances ensemble stability, but not ensemble size.** **A** Schematic of imaging preparation. **B** Approximate imaging plane (dotted line). **C** Sample frame showing dmPFC neurons (top), calcium activity and deconvolved spikes (traces and dots, bottom). **D** Schematic showing the quantification of ensemble size and stability. For each trial, the activity measure “ $p_{\text{active}}$ ” of individual neurons was concatenated into an ensemble response vector (left). Ensemble size: the active population ( $p_{\text{active}} > 0$ ) and its median activity were inferred from the cumulative distribution of each ensemble response vector (middle). Ensemble stability: correlation between all ensemble response vectors of a session (right). **E** Ensemble correlation between consecutive encoding trials (ET1, ET2, and ET3; left) and between ET3 and RT1 (right) on individual sessions ( $n = 499$ ) was higher for longer  $ET_i$ s (consecutive encoding trials:  $F_{4,495} = 10.7$ ,  $p = 2.89 \cdot 10^{-5}$ ;  $ET_i$ :  $t = 4.39$ ,  $p = 1.71 \cdot 10^{-4}$ ; ET3–RT1:  $F_{4,495} = 7.03$ ,  $p = 9.93 \cdot 10^{-4}$ ;  $ET_i$ :  $t = 3.71$ ,  $p = 2.37 \cdot 10^{-4}$ ). Performance did not significantly covary with the ensemble correlation (consecutive encoding trials:  $t = 1.75$ ,  $p = 0.08$ ; ET3–RT1:  $t = 0.84$ ,  $p = 0.40$ ). **F** GLM weight of  $ET_i$  as predictor for ensemble correlation. The ensemble correlation between ET1 and ET2, as well as ET3 and RT1, depended on  $ET_i$  (ET1 vs. ET2:  $H_3 = 17.5$ ,  $p = 5.64 \cdot 10^{-4}$ ; ET3 vs. RT1:  $H_3 = 15.5$ ,  $p = 1.45 \cdot 10^{-3}$ ). **G** Both the size of the active population and its median activity depended on the trial identity (i.e. first, second or third trial) but not the  $ET_i$  (size active population  $F_{4,495} = 51.0$ ,  $p = 1.85 \cdot 10^{-22}$ ; trial identity:  $t = -10.1$ ,  $p = 1.63 \cdot 10^{-23}$ ;  $ET_i$ :  $t = 0.49$ ,  $p = 0.62$ ; median activity of active population:  $F_{4,495} = 86.8$ ,  $p = 2.83 \cdot 10^{-37}$ ; trial identity:  $t = 13.0$ ,  $p = 1.01 \cdot 10^{-37}$ ;  $ET_i$ :  $t = -1.98$ ,  $p = 0.048$ ). Cg1: cingulate cortex, area 1, M2: secondary motor cortex, PrL: prelimbic cortex, SD: standard deviation. Scale bars: 200  $\mu\text{m}$  (B), 100  $\mu\text{m}$  (C). \*\*\*  $p < 0.001$ .

174 **The size of the neuronal ensemble is not affected by trial spacing.** We evaluated whether trial  
175 spacing altered the size of the neuronal ensemble (**Figure 3D**). From the cumulative distribution of each  
176 trial's ensemble response vector, we inferred the active fraction within the neuronal population (i.e. the  
177 neuronal ensemble,  $p_{\text{active}} > 0$ ) and the median activity of that population (**Figure 3D**). Interestingly, the  
178 neuronal ensembles became smaller across subsequent encoding and retrieval trials (i.e. first vs. second vs.  
179 third trial; **Figure 3G**). In addition, the median activity of the neuronal ensemble increased across subsequent  
180 trials (**Figure 3G**), indicating that the ensemble became sparser, yet the single neurons responded more  
181 strongly (see Discussion). However, neither ensemble size (i.e. the relative number of active neurons), nor its  
182 median activity was altered by trial spacing (**Figure 3G**).

183 With the overall ensemble size remaining stable, the memory enhancing effect of trial spacing could be  
184 attributed to a shift in the fraction of neurons preferentially responding to task-related events. We identified  
185 eight task-related behavioral variables that correlated with reward, motor activity, and decision-making:  
186 reward onset, reward approach (i.e. the final entry into the arm containing the rewarded sandwell), acceleration,  
187 speed, digging onset, digging offset, entry into the center platform, and intra-arm turns (**Figure S9A–C**; <sup>38</sup>).  
188 On first inspection, neuronal responses did not appear time-locked or consistently occurring with the onset of  
189 these defined behaviors (**Figure S9D**). This was likely related to the naturalistic character of the everyday  
190 memory task, in which the individual components that comprise a behavior can occur simultaneously, whereas  
191 these appear discrete in more controlled experimental settings.

192 To determine whether the activity of individual neurons was modulated by task-relevant behaviors, we  
193 implemented an encoding model (generalized linear model, GLM). The model fitted the eight aforementioned  
194 behavioral variables as time-varying predictors of a neuron's binarized inferred firing activity (**Figure 4A, B**,  
195 see Supplemental Information; <sup>39</sup>). A neuron was classified as responsive to one of these behavioral variables  
196 if the weight of its corresponding time-varying predictor was significantly different from zero. Decoding  
197 performance was better upon training the encoding model with observed as compared to permuted inferred  
198 firing activity (**Figure 4C**). Across sessions, 22.7% of neurons were significantly modulated by at least one  
199 behavioral variable, most often reward onset, approach to reward, and digging onset (19.9%, 16.2%, and  
200 18.1% of the population of modulated neurons, respectively; **Figure 4D**). This shows that dmPFC neuronal  
201 activity during the everyday memory task is modulated by specific behavioral variables.

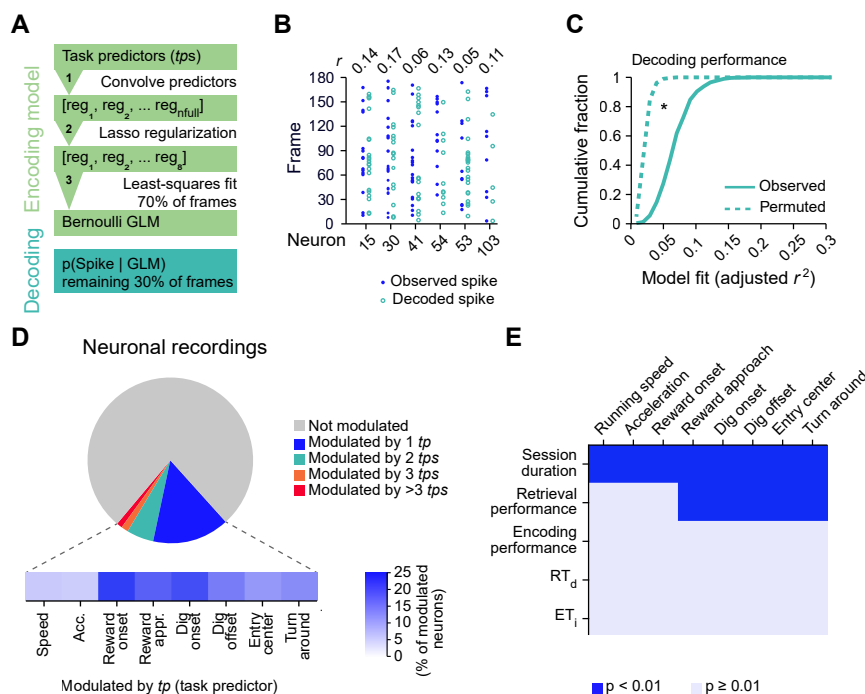

**Figure 4. dmPFC neurons respond to multiple task-relevant behaviors irrespective of trial spacing.** **A** Schematic of the generalized linear model. **B** Pearson's  $r$  between observed and decoded spikes of the test subset for six randomly selected neurons. **C** Decoding performance was significantly better for observed than permuted spiking activity (observed vs. permuted:  $D_{100} = 0.21$ ,  $p = 0.021$ ). **D** Fractions of neurons ( $n = 105070$  neurons from 499 sessions across 19 mice) that were modulated (top). Fractions of neurons modulated by the respective task predictor (bottom). **E** The effect of the five features session duration, performance on RT1 (“retrieval performance”), summed performance across ETs (“encoding performance”),  $ET_1$ , and  $RT_d$ , on the fraction of neurons modulated by the eight  $tps$ . These five features differentially affected the fraction of neurons modulated by running speed (F-statistic vs. constant model  $[F]_{5,494} = 27.9$ ,  $p = 6.95 \cdot 10^{-25}$ ; session duration [SeD]:  $t = 9.80$ ,  $p = 7.65 \cdot 10^{-21}$ ), acceleration ( $F_{5,494} = 5.21$ ,  $p = 1.13 \cdot 10^{-4}$ ; SeD:  $t = 3.25$ ,  $p = 1.22 \cdot 10^{-3}$ ), reward onset ( $F_{5,494} = 28.6$ ,  $p = 1.62 \cdot 10^{-25}$ ; SeD:  $t = 9.84$ ,  $p = 5.70 \cdot 10^{-21}$ ), reward approach ( $F_{5,494} = 31.1$ ,  $p = 1.55 \cdot 10^{-27}$ ; SeD:  $t = 9.11$ ,  $p = 2.04 \cdot 10^{-18}$ ), retrieval performance [RP]:  $t = 4.27$ ,  $p = 2.35 \cdot 10^{-5}$ ), dig onset ( $F_{5,494} = 38.9$ ,  $p = 1.05 \cdot 10^{-33}$ ; SeD:  $t = 11.2$ ,  $p = 4.22 \cdot 10^{-26}$ , RP:  $t = 3.51$ ,  $p = 4.86 \cdot 10^{-4}$ ), dig offset ( $F_{5,494} = 38.9$ ,  $p = 1.97 \cdot 10^{-33}$ ; SeD:  $t = 10.9$ ,  $p = 3.65 \cdot 10^{-25}$ , RP:  $t = 2.95$ ,  $p = 3.30 \cdot 10^{-3}$ ), entry into the center platform ( $F_{5,494} = 39.2$ ,  $p = 6.21 \cdot 10^{-34}$ ; SeD:  $t = 10.5$ ,  $p = 2.38 \cdot 10^{-23}$ , RP:  $t = 4.68$ ,  $p = 3.64 \cdot 10^{-6}$ ), and intra-arm turns ( $F_{5,494} = 25.9$ ,  $p = 2.80 \cdot 10^{-23}$ ; SeD:  $t = 7.97$ ,  $p = 1.07 \cdot 10^{-14}$ , RP:  $t = 3.77$ ,  $p = 1.82 \cdot 10^{-4}$ ). All post hoc tests were Bonferroni corrected for five comparisons, only significant post hoc tests are reported. Acc: acceleration, appr: approach, GLM: generalized linear model,  $tp$ : task predictor, reg: regressor. \*  $p < 0.05$ .

202 However, trial spacing did not have a significant influence on the fractions of behaviorally modulated neurons,  
 203 nor did the encoding performance or retrieval delay duration (**Figure 4E**). Firing modulation by all identified  
 204 task-relevant behaviors did depend on session duration (**Figure 4E**), likely because an increased session  
 205 duration inherently produces more neuronal spikes and therefore data for the GLM to fit. Furthermore,  
 206 retrieval performance correlated with the fraction of neurons modulated by certain behavioral variables,  
 207 i.e. reward approach, dig onset, dig offset, entry into the center platform, and intra-arm turns. Therefore,

208 we conclude that a sparse population of dmPFC neurons encoded task-related behaviors similarly across  
209 experimental conditions and we did not find evidence of an effect of trial spacing on the number of neurons  
210 involved. Overall, trial spacing in the everyday memory task enhances ensemble stability but it does not  
211 affect ensemble size.

## 212 Discussion

213 We explored whether trial spacing strengthens memory by altering characteristics of the neuronal ensemble.  
214 We observed the behavioral effect of trial spacing on the everyday memory task and characterized the activity  
215 of prefrontal neurons that were necessary for task performance. During learning and upon memory retrieval,  
216 the ensemble activity pattern reactivated more precisely when trial spacing was increased. In contrast, trial  
217 spacing did not affect the overall size of the activated ensemble, nor the size of the subpopulations of neurons  
218 that responded to specific task-related behaviors. Our results suggest that more precise reactivation of the  
219 neuronal ensemble during spaced training strengthens connectivity that is conducive to memory retention  
220 and retrieval.

221 **Spaced training strengthens memory.** Spaced training in the everyday memory task strengthens memory  
222 in rats <sup>7</sup> and we report the same in mice. Earlier studies investigating the effect of trial spacing on episodic-like  
223 memory in mice <sup>6</sup> and rats <sup>40</sup> have reported an inverted U-shaped relation, although the exact width and  
224 amplitude of the effect varied. Our study likewise reports an inverted U-shaped relation, as spacing trials  
225 at intervals of 60 min resulted in the strongest next-day (24 hrs) memory, while shorter (10 min and 30  
226 min) and longer intervals (180 min) resulted in substantially poorer memory. The observed temporal window  
227 aligns with expectations from facilitated molecular signaling and synaptic physiology underlying the spacing  
228 effect <sup>2; 6; 8</sup>.

229 As compared to spaced training, massed training in the everyday memory task affected memory in a  
230 rather complex manner. As expected, memory retrieval was poorer after massed training than after any  
231 spaced training regimen. Surprisingly, the ability to retrieve memory following massed training was better  
232 after 24 hrs, and even 48 hrs, as compared to 2.5 hrs. We propose that memory acquired during massed  
233 training might have only been stabilized after several hours. A similar phenomenon has been reported during

234 massed motor learning in mice, in which both memory stabilization and concomitant synaptic remodeling  
235 occurred delayed as compared to spaced motor learning<sup>5</sup>. However, delayed memory stabilization was not  
236 observed in two earlier studies using the everyday memory task<sup>7; 41</sup>. This variation can possibly be attributed  
237 to methodological differences such as the animal model<sup>7; 41</sup>, the number of encoding trials<sup>41</sup>, navigational  
238 strategy<sup>33</sup>, handling, or intertrial sleep epochs.

239 **Prefrontal activity in the everyday memory task.** We focused our neuronal recordings and manipu-  
240 lations on the dmPFC. Activity of dmPFC neurons correlated with a range of task-relevant events on the  
241 everyday memory task, most notably reward (anticipation) and motor behavior, which is consistent with other  
242 reports in rodent PFC<sup>38; 42</sup>. We established a causal link between prefrontal activity and memory formation  
243 by chemogenetically inactivating the dmPFC, which impaired next-day memory. This seemingly conflicts  
244 with reports that inactivation of prefrontal areas disrupts remote but not recent memories<sup>43</sup>. However, the  
245 early dependence of task-instilled memories on the dmPFC may have followed from accelerated systems  
246 consolidation, as observed in other behavioral paradigms where learning occurred within the context of  
247 relevant pre-existing knowledge<sup>30</sup>.

248 Episodic-like memories formed in the everyday memory task unlikely depended solely on the dmPFC.  
249 Specifically the hippocampus<sup>44</sup> and retrosplenial cortex<sup>45</sup> have long been implicated in various forms  
250 of declarative memory. Indeed, the hippocampus and prefrontal cortex have been suggested to perform  
251 complementary roles in episodic-like memory processing<sup>31; 46</sup>. Furthermore, retrosplenial neurons form  
252 ensembles that stabilize during learning of spatial reference memory tasks<sup>47</sup> and the stability of these  
253 retrosplenial ensembles can predict memory retention<sup>48</sup>. Interestingly, a recent study shows that trial spacing  
254 upregulates a variety of genes, including immediate early genes, in both hippocampus and retrosplenial cortex  
255 in the rat<sup>7</sup>. Whether and how neuronal ensembles in the mouse hippocampus and retrosplenial cortex are  
256 affected by spaced training in the everyday memory task would be of interest for future investigation.

257 **The spacing effect, synaptic strength, and memory stability.** Our experiments explored the possibility  
258 that trial spacing enhances memory by altering the size or stability of a neuronal ensemble. We quantified  
259 ensemble size using two distinct methods. First, we determined the neuronal ensemble size using calcium  
260 imaging of GCaMP6-expressing neurons, which closely reflects the temporal dynamics of neuronal firing

261 throughout each trial<sup>36</sup>. This approach allowed for detecting both highly active and transiently activated  
262 neurons, while controlling for the influence of training duration on ensemble size by temporal subsampling.  
263 Second, we quantified ensemble size from the number of c-Fos-expressing neurons after a full encoding session.  
264 This method is more likely to only include strongly activated neurons that subsequently underwent plasticity  
265 implicated in long-term memory storage<sup>49</sup>. Despite the methodological differences between these approaches,  
266 both yielded similar results: the size of the active population was not influenced by trial spacing. This is  
267 in agreement with the previous observation that ensemble size is generally quite stable and is not strongly  
268 influenced by factors such as the type of memory and the strength of a memory<sup>24</sup>.

269 Irrespective of trial spacing, behavioral training activated a progressively smaller population of neurons,  
270 whose activity was stronger than in previous trials. Sparsening of the neuronal ensemble can enhance memory  
271 selectivity, as for instance observed during *Drosophila* olfactory conditioning<sup>26</sup>. Several studies propose that  
272 this is the consequence of a competitive process<sup>9; 24</sup>, in which highly excitable pyramidal neurons exclude less  
273 excitable neighboring pyramidal neurons from becoming part of the neuronal ensemble via local inhibition.  
274 A similar process might ensure ensemble sparsity in the everyday memory task, thereby balancing memory  
275 fidelity with memory capacity<sup>9</sup>.

276 The main consequence of trial spacing was that the neuronal ensemble reactivated in a pattern more  
277 reminiscent of previous learning experiences, corroborating theoretical predictions<sup>50</sup> and reports in human  
278 subjects<sup>23</sup>. We suggest that more precise ensemble reactivation reflects specific synaptic processes that  
279 underlie memory formation<sup>14</sup>. One such process is CaMKII activation, which unfolds on a similar timescale  
280 as spacing-induced memory enhancement and has previously been implicated in the spacing effect<sup>2</sup>. A major  
281 outstanding question is whether these synaptic processes affect a random population of synapses or are  
282 confined to previously tagged synapses, as predicted by the synaptic tagging and capture theory<sup>51</sup>. This  
283 could be addressed using *in vivo* imaging of structure and function of individual spines during the everyday  
284 memory assay<sup>52</sup>.

285 Overall, our data show that trial spacing increases the strength of connectivity within the ensemble,  
286 supposedly making memory more robust and increasing the probability of memory retrieval. Our findings  
287 provide the first direct description of how activity of the same neuronal population during memory encoding  
288 and retrieval mediates the spacing effect, a phenomenon originally described over a century ago<sup>1</sup>.

## 289 **Acknowledgments**

290 We thank Claudia Huber, Andreas Kucher, Max Sperling, Volker Staiger, Helena Tultschin, and Frank Voss  
291 for technical assistance; Sandra Reinert for help with the implant method and discussions; Julia Kuhl for  
292 illustrations. This project was funded by the Max Planck Society and the Collaborative Research Center  
293 SFB870 of the German Research Foundation (DFG) to T. B. and M. H.

## 294 **Author Contributions**

295 All authors designed the study. A. G. acquired the data. A. G. and P. G. analyzed the data. T. B. and M. H.  
296 acquired funding. All authors wrote the manuscript.

## 297 **Declaration of Interests**

298 The authors have declared that no competing interests exist.

## 299 **Method Summary**

300 For greater detail, refer to Supplemental Methods.

301 **Mice.** Female C57BL/6NRj mice ( $\sim$  postnatal day 90 at experimental onset) were communally housed in  
302 enriched, individually ventilated cages. All procedures were performed in accordance with the institutional  
303 guidelines of the Max Planck Society and the local government (Regierung von Oberbayern, Germany).

304 **Surgical procedures.** Mice were anesthetized with a mixture of fentanyl, midazolam, and medetomidine  
305 in saline ( $0.05 \text{ mg kg}^{-1}$ ,  $5 \text{ mg kg}^{-1}$ , and  $0.5 \text{ mg kg}^{-1}$  respectively, injected intraperitoneally). A head plate  
306 implantation was carried out as previously described<sup>53</sup>. For imaging experiments, a 3 mm circular cran-  
307 iotomy was created (centered at AP 2.0 mm, ML 0.75 mm from bregma) and a viral vector mixture of  
308 AAV2/1:CamKII0.4-Cre ( $4.6 \cdot 10^9 \text{ GC ml}^{-1}$ ), and AAV2/1:hSyn-flex-GCaMP6m ( $3.2 \cdot 10^{12} \text{ GC ml}^{-1}$ ) was unilat-  
309 erally injected into the dmPFC ( $150 \text{ nl injection}^{-1}$ ). Subsequently, a microprism was implanted by removing  
310 the dura over one hemisphere and lowering the microprism into the sagittal fissure, facing the other hemisphere.



311 For chemogenetic inactivation experiments, a viral vector mixture of AAV2/1:CamKII0.4-Cre ( $2.1 \cdot 10^{11}$  GC  
312  $\text{ml}^{-1}$ ), and either AAV2/9:hSyn-DIO-mCherry ( $2.1 \cdot 10^{12}$  GC  $\text{ml}^{-1}$ ) or AAV2/9:hSyn-DIO-hM4D(Gi)-mCherry  
313 ( $2.3 \cdot 10^{12}$  GC  $\text{ml}^{-1}$ ) was bilaterally injected into the dmPFC ( $150 \text{ nl injection}^{-1}$ ). After surgery, anesthetic  
314 agents were antagonized with a mixture of naloxone, flumazenil, and atipamezole in saline ( $1.2 \text{ mg kg}^{-1}$ ,  $0.5$   
315  $\text{mg kg}^{-1}$ , and  $2.5 \text{ mg kg}^{-1}$  respectively, injected subcutaneously [s.c.]). Mice received carprofen ( $5 \text{ mg kg}^{-1}$ ,  
316 injected s.c.) and dexamethasone ( $2 \text{ } \mu\text{g kg}^{-1}$ , injected s.c.) for two subsequent days.

317 **Behavioral procedures.** Mouse handling, training, and testing was performed similarly as previously  
318 described <sup>7</sup>, with the main exception that training was conducted in a custom-made radial arm maze (**Figure**  
319 **1A, S1A–C**). Behavioral training was recorded with an overhead video camera and the frame-by-frame  
320 position of the mouse was automatically annotated using custom-written MATLAB software. Each session  
321 typically consisted of three encoding trials (ETs) and three retrieval trials (RTs; **Figure 1B**). The ETs  
322 had an intertrial interval of either 30 s (“massed”), 10 min, 30 min, or 60 min (all “spaced”) and the delay  
323 between the final ET and first RT was 2.5 hrs or 24 hrs (**Figure 1B**). For each ET and RT, the number of  
324 erroneous sandwell digs was counted. For each trial, the performance index (PI) was calculated as

$$PI = \frac{error_{\max} - error_{\text{observed}}}{error_{\max}} \cdot 100\%$$

325 with  $error_{\max}$  being 1 for ETs and 5 for RTs. Probe trial sessions were conducted as normal, however the  
326 rewarded sandwell did not contain a reward for the first 60 s of the first retrieval trial. Performance on probe  
327 trials was quantified as the relative dig time at the rewarded sandwell (“occupancy difference score”). For  
328 chemogenetic inactivation, mice were injected intraperitoneally with either vehicle or CNO ( $5 \text{ mg kg}^{-1}$ ) 45  
329 min before behavioral testing (**Figure 2D**).

330 **Histology and immunohistochemistry.** For experiments quantifying immediate early gene expression,  
331 mice were perfused 90 min after the onset of the second ET (**Figure 2A**). Brains were sectioned on a  
332 microtome ( $40 \text{ } \mu\text{m}$ , coronal) and every 5<sup>th</sup> section containing dmPFC was stained for c-Fos and DAPI.  
333 Micrographs containing the dmPFC were acquired using a laser-scanning confocal microscope (TCS SP8,  
334  $20\times$  NA 0.75 objective) and analyzed by counting the number of c-Fos immunopositive neurons in a blind

335 manner in the dmPFC.

336 **Miniaturized microscopy and data processing.** Images were acquired with a commercially available  
337 miniaturized microscope (Basic Fluorescence Microscopy System - Surface, Doric Lenses) at a frame rate  
338 of 10 Hz and a resolution of  $630 \times 630$  pixels (field-of-view  $1 \text{ mm}^2$ ). Laser power under the objective lens  
339 ( $2\times$  magnification, 0.5 NA) was  $<1 \text{ mW}$  for all imaging experiments. Image registration, motion correction,  
340 intrasession frame concatenation, and source extraction were carried out using custom implementations of  
341 the NoRMCorre and CNMF-E algorithms<sup>37; 54</sup>. We used a probabilistic measure ( $p_{\text{active}}$ ) to quantify the  
342 activity of an individual neuron during an individual trial, controlling for trial length (**Figure S8C**).

343 **Generalized linear model (GLM) quantifying behavioral modulation of neuronal responses.** A  
344 GLM was fitted to the spiking activity of single neurons to establish the predictive power of relevant task  
345 predictors (*tps*) for neuronal activity (**Figure 4A**). Briefly, a design matrix containing the *tps* and the  
346 spiking dataset (70% of session's frames) were supplied to the MATLAB function "*fitglm*". When a resulting  
347 regression coefficient was significant after Bonferroni correction, the neuron was classified as modulated by  
348 this task predictor. The model's decoding performance was quantified by correlating the observed spiking  
349 responses (remaining 30% of session's frames) with the responses predicted by the GLM using the MATLAB  
350 function "*predict*".

351 **Statistical analysis.** All data are presented as mean ( $\pm$  SEM) unless stated otherwise. Normality of  
352 distributions was assessed using the Kolmogorov-Smirnov test and appropriate parametric or non-parametric  
353 tests were used. Parametric analyses included the Student's t-test (test statistic *t*) and general linear models  
354 including one-way ANOVA (test statistic *F*) for data consisting of two groups or more than two groups,  
355 respectively. Non-parametric analyses for data consisting of two groups included the Kolmogorov-Smirnov  
356 test (test statistic *D*), the Mann-Whitney U test (test statistic *U*), Spearman correlation (test indicated  
357 by Spearman's rank correlation coefficient  $r_s$ ), and the Wilcoxon's rank-sum test (test statistic *W*). Non-  
358 parametric analyses for data consisting of more than two groups included Pearson's chi-square test (test  
359 statistic  $X^2$ ) and the Kruskal-Wallis test (test statistic *H*). For all statistical tests, alpha was set at 0.05 and  
360 tests were conducted two-tailed unless stated otherwise. In case of multiple comparisons, a Bonferroni alpha  
361 correction was applied.

## References

1. Ebbinghaus, H. *Über das Gedächtnis: Untersuchungen zur experimentellen Psychologie*. (Duncker & Humblot, 1885).
2. Smolen, P., Zhang, Y. & Byrne, J. H. The right time to learn: Mechanisms and optimization of spaced learning. *Nat. Rev. Neurosci.* **17**, 77–88 (2016).
3. Kogan, J. H. et al. Spaced training induces normal long-term memory in CREB mutant mice. *Curr. Biol.* **7**, 1–11 (1997).
4. Genoux, D. et al. Protein phosphatase 1 is a molecular constraint on learning and memory. *Nature* **418**, 970–975 (2002).
5. Aziz, W. et al. Distinct kinetics of synaptic structural plasticity, memory formation, and memory decay in massed and spaced learning. *Proc. Natl. Acad. Sci. U. S. A.* **111**, E194–E202 (2014).
6. Seese, R. R., Wang, K., Yao, Y. Q., Lynch, G. & Gall, C. M. Spaced training rescues memory and ERK1/2 signaling in fragile X syndrome model mice. *Proc. Natl. Acad. Sci. U. S. A.* **111**, 16907–16912 (2014).
7. Nonaka, M. et al. Everyday memory: towards a translationally effective method of modelling the encoding, forgetting and enhancement of memory. *Eur. J. Neurosci.* **46**, 1937–1953 (2017).
8. Kramár, E. A. et al. Synaptic evidence for the efficacy of spaced learning. *Proc. Natl. Acad. Sci. U. S. A.* **109**, 5121–5126 (2012).
9. Rao-Ruiz, P., Yu, J., Kushner, S. A., & Josselyn, S. A. Neuronal competition: Microcircuit mechanisms define the sparsity of the engram. *Curr. Opin. Neurobiol.* **54**, 163–170 (2019).
10. Silva, A. J., Zhou, Y., Rogerson, T., Shobe, J., & Balaji, J. Molecular and cellular approaches to memory allocation in neural circuits. *Science* **326**, 391–395 (2009).
11. Garner, A. R. et al. Generation of a synthetic memory trace. *Science* **335**, 1513–1516 (2012).
12. Rashid, A. J. et al. Competition between engrams influences fear memory formation and recall. *Science* **353**, 383–387 (2016).
13. Hebb, D. O. *The organization of behavior: A neuropsychological theory*. (Wiley, 1949).
14. Holtmaat, A., & Caroni, P. Functional and structural underpinnings of neuronal assembly formation in learning. *Nat. Neurosci.* **19**, 1553–1562 (2016).
15. Engert, F., & Bonhoeffer, T. Dendritic spine changes associated with hippocampal long-term synaptic plasticity. *Nature* **399**, 66–70 (1999).
16. Nadel, L., & Moscovitch, M. Memory consolidation, retrograde amnesia and the hippocampal complex. *Curr. Opin. Neurobiol.* **7**, 217–227 (1997).
17. Tonegawa, S., Morrissey, M. D. & Kitamura, T. The role of engram cells in the systems consolidation of memory. *Nat. Rev. Neurosci.* **19**, 485–498 (2018).
18. Liu, X. et al. Optogenetic stimulation of a hippocampal engram activates fear memory recall. *Nature* **484**, 381–385 (2012).
19. Reijmers, L. G., Perkins, B. L., Matsuo, N., & Mayford, M. Localization of a stable neural correlate of associative memory. *Science* **317**, 1230–1233 (2007).
20. Pignatelli, M., et al. Engram cell excitability state determines the efficacy of memory retrieval. *Neuron* **101**, 274–284 (2019).

21. Kitamura, T. et al. Engrams and circuits crucial for systems consolidation of a memory. *Science* **356**, 73–78 (2017).
22. Choi, J. H. et al. Interregional synaptic maps among engram cells underlie memory formation. *Science* **360**, 430–435 (2018).
23. Feng, K. et al. Spaced learning enhances episodic memory by increasing neural pattern similarity across repetitions. *J. Neurosci.* **39**, 5351–5360 (2019).
24. Morrison, D. J. et al. Parvalbumin interneurons constrain the size of the lateral amygdala engram. *Neurobiol. Learn. Mem.* **135**, 91–99 (2016).
25. Gdalyahu, A. et al. Associative fear learning enhances sparse network coding in primary sensory cortex. *Neuron* **75**, 121–132 (2012).
26. Lin, A. C., Bygrave, A. M., De Calignon, A., Lee, T., & Miesenböck, G. Sparse, decorrelated odor coding in the mushroom body enhances learned odor discrimination. *Nat. Neurosci.* **17**, 559–568 (2014).
27. Vyazovskiy, V. V., Cirelli, C., Pfister-Genskow, M., Faraguna, U., & Tononi, G. Molecular and electrophysiological evidence for net synaptic potentiation in wake and depression in sleep. *Nat. Neurosci.* **11**, 200–208 (2008).
28. Cai, D. J. et al. A shared neural ensemble links distinct contextual memories encoded close in time. *Nature* **534**, 115–118 (2016).
29. de Bruin, J. P. C., Sánchez-Santed, F., Heinsbroek, R. P. W., Donker, A. & Postmes, P. A behavioural analysis of rats with damage to the medial prefrontal cortex using the Morris water maze: Evidence for behavioural flexibility, but not for impaired spatial navigation. *Brain Res.* **652**, 323–333 (1994).
30. Tse, D. et al. Schema-dependent gene activation and memory encoding in neocortex. *Science* **333**, 891–895 (2011).
31. Eichenbaum, H. Prefrontal-hippocampal interactions in episodic memory. *Nat. Rev. Neurosci.* **18**, 547–558 (2017).
32. Sekeres, M. J., Winocur, G., & Moscovitch, M. The hippocampus and related neocortical structures in memory transformation. *Neurosci. Lett.* **680**, 39–53 (2018).
33. Broadbent, N. et al. A stable home-base promotes allocentric memory representations of episodic-like everyday spatial memory. *Eur. J. Neurosci.* **51**, 1539–1558 (2020).
34. Armbruster, B. N., Li, X., Pausch, M. H., Herlitze, S. & Roth, B. L. Evolving the lock to fit the key to create a family of G protein-coupled receptors potently activated by an inert ligand. *Proc. Natl. Acad. Sci. U. S. A.* **104**, 5163–5168 (2007).
35. Ghosh, K. K. et al. Miniaturized integration of a fluorescence microscope. *Nat. Methods* **8**, 871–878 (2011).
36. Chen, T. W. et al. Ultrasensitive fluorescent proteins for imaging neuronal activity. *Nature* **499**, 295–300 (2013).
37. Zhou, P. et al. Efficient and accurate extraction of *in vivo* calcium signals from microendoscopic video data. *Elife* **7**, 1–37 (2018).
38. Pinto, L. & Dan, Y. Cell-type-specific activity in prefrontal cortex during goal-directed behavior. *Neuron* **87**, 437–450 (2015).
39. Runyan, C. A., Piasini, E., Panzeri, S. & Harvey, C. D. Distinct timescales of population coding across cortex. *Nature* **548**, 92–96 (2017).
40. Tintorelli, R. et al. Spatial-memory formation after spaced learning involves ERKs1/2 activation through a behavioral-tagging process. *Sci. Rep.* **10**, 1–11 (2020).

41. Takeuchi, T. et al. Locus coeruleus and dopaminergic consolidation of everyday memory. *Nature* **537**, 357–362 (2016).
42. Euston, D. R., Gruber, A. J. & McNaughton, B. L. The role of medial prefrontal cortex in memory and decision making. *Neuron* **76**, 1057–1070 (2012).
43. Maviel, T., Durkin, T. P., Menzaghi, F. & Bontempi, B. Sites of neocortical reorganization critical for remote spatial memory. *Science* **305**, 96–99 (2004).
44. Scoville, W. B., & Milner, B. Loss of recent memory after bilateral hippocampal lesions. *Journal of neurology, neurosurgery, and psychiatry* **20**, 11-21 (1957).
45. Maddock, R.J. The retrosplenial cortex and emotion: New insights from functional neuroimaging of the human brain. *Trends Neurosci.* **22**, 310–316 (1999).
46. Place, R., Farovik, A., Brockmann, M. & Eichenbaum, H. Bidirectional prefrontal-hippocampal interactions support context-guided memory. *Nat. Neurosci.* **19**, 992–994 (2016).
47. Czajkowski, R. et al. Encoding and storage of spatial information in the retrosplenial cortex. *Proc. Natl. Acad. Sci. U. S. A.* **111**, 8661–8666 (2014).
48. Milczarek, M. M., Vann, S. D. & Sengpiel, F. Spatial memory engram in the mouse retrosplenial cortex. *Curr. Biol.* **28**, 1975–1980 (2018).
49. Bullitt, E. Expression of c[**U+2010**]fos[**U+2010**]like protein as a marker for neuronal activity following noxious stimulation in the rat. *Journal of Comparative Neurology*, **296**, 517-530 (1990).
50. Hintzman, D. L., Summers, J. J., & Block, R. A. Spacing judgments as an index of study-phase retrieval. *J. Exp. Psychol. Hum. Learn. Mem.* **1**, 31–40 (1975).
51. Redondo, R. L., & Morris, R. G. M. Making memories last: The synaptic tagging and capture hypothesis. *Nat. Rev. Neurosci.* **12**, 17–30 (2011).
52. Zong, W. et al. Fast high-resolution miniature two-photon microscopy for brain imaging in freely behaving mice. *Nat. Methods* **14**, 713–719 (2017).
53. Glas, A., Hübener, M., Bonhoeffer, T., & Goltstein, P. M. Benchmarking miniaturized microscopy against two-photon calcium imaging using single-cell orientation tuning in mouse visual cortex. *PLOS ONE* **14**, 1-18 (2019).
54. Pnevmatikakis, E. A. & Giovannucci, A. NoRMCorre: An online algorithm for piecewise rigid motion correction of calcium imaging data. *J. Neurosci. Methods* **291**, 83–94 (2017).
